# Supplementary material
Source: PubMed Central journal article supplement (PMC7934449)
Supplement: mmc1.pdf [file mmc1.pdf]

## **Supplemental Information**

### **Improved Genome Editing through Inhibition of FANCM and Members of the BTR Dissolvase Complex**

**Gustavo de Alencastro, Francesco Puzzo, Mara Pavel-Dinu, Feijie Zhang, Sirika Pillay, Karim Majzoub, Matthew Tiffany, Hagoon Jang, Adam Sheikali, M. Kyle Cromer, Ruhikanta Meetei, Jan E. Carette, Matthew H. Porteus, Katja Pekrun, and Mark A. Kay**

**Supplementary figures:**

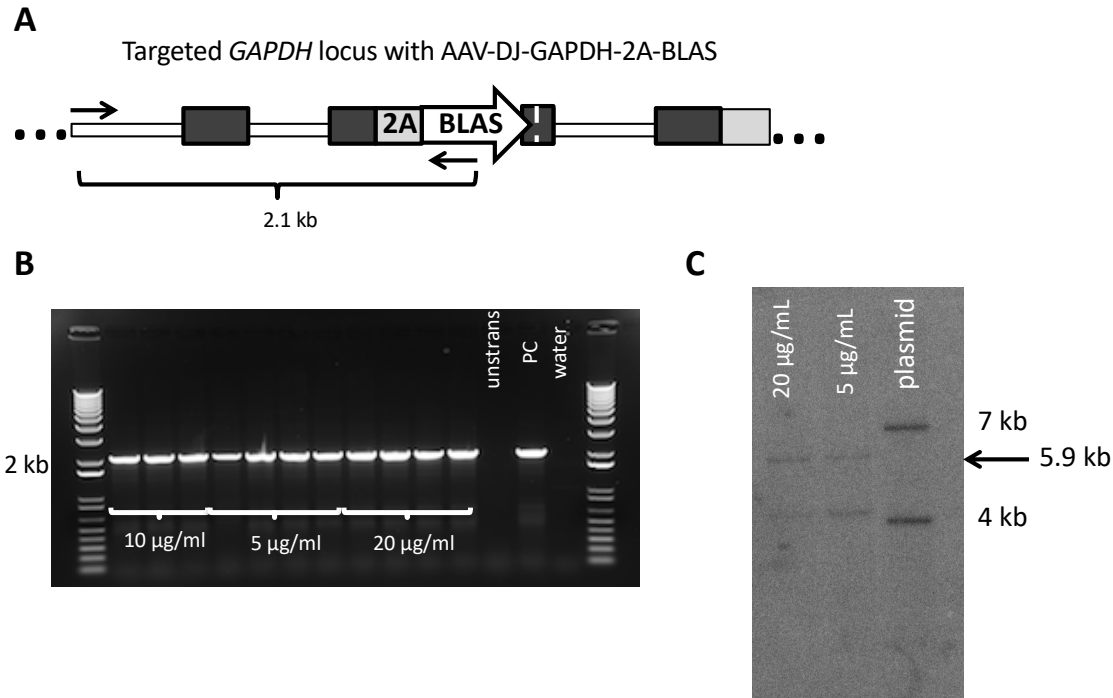

**Supplementary Figure 1. Characterization of the AAV-GAPDH(Hap1)-2A-BLAS targeting**

**vector.** (A) Scheme of the PCR strategy used to detect TI events in the *GAPDH* locus after transduction with AAV-GAPDH(Hap1)-2A-BLAS. The forward primer was designed to anneal outside the *GAPDH* homology arm sequence (i.e. outside of the part that is also included in the rAAV vector) and the reverse primer was designed to anneal within the blasticidin resistance gene coding sequence. Upon TI, a 2.1 kb fragment is generated. (B) Detection of TI events using amplification of the *GAPDH* locus. Individual HAP1 cell clones were picked and expanded after transducing HAP1 cells with AAV-GAPDH(Hap1)-2A-BLAS and selecting with three different blasticidin drug concentrations (5, 10 and 20 µg/ml). Untransduced HAP1 cells were used as negative controls. (C) Southern blot analysis of DNA obtained from HAP1 cells after transduction with AAV-GAPDH(Hap1)-2A-BLAS and selection with blasticidin (5 and 20 µg/ml). The expected size for TI is approximately 5.9 kb. The lower band (~4.3 kb) corresponds to episomal

AAV. Expected sizes for control plasmids are approximately 7.0 kb and 4.0 kb for BLAS-containing plasmid.

**A**

**HAP1-FANCM K/O clone B12 (32 bp deletion)**

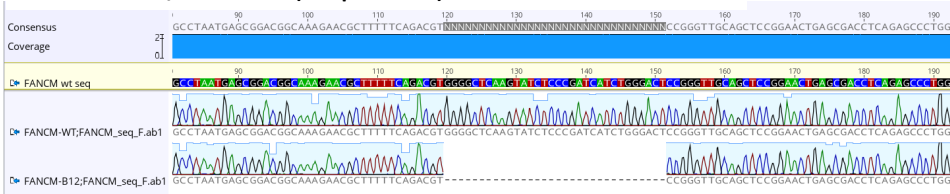

**HAP1-FANCM K/O clone C1 (77bp insertion)**

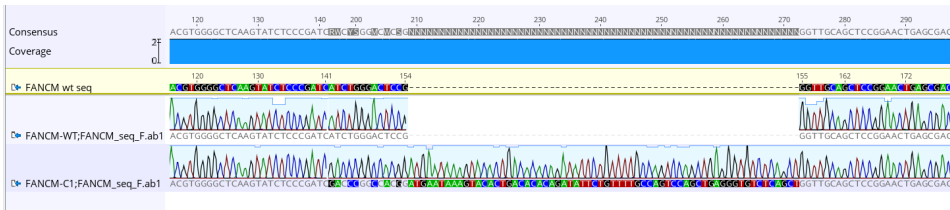

**B**

Targeted *GAPDH* locus with AAV-DJ-GAPDH-2A-GFP

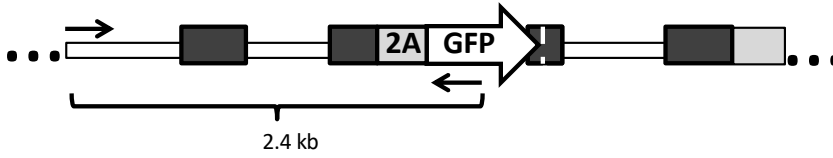

**C**

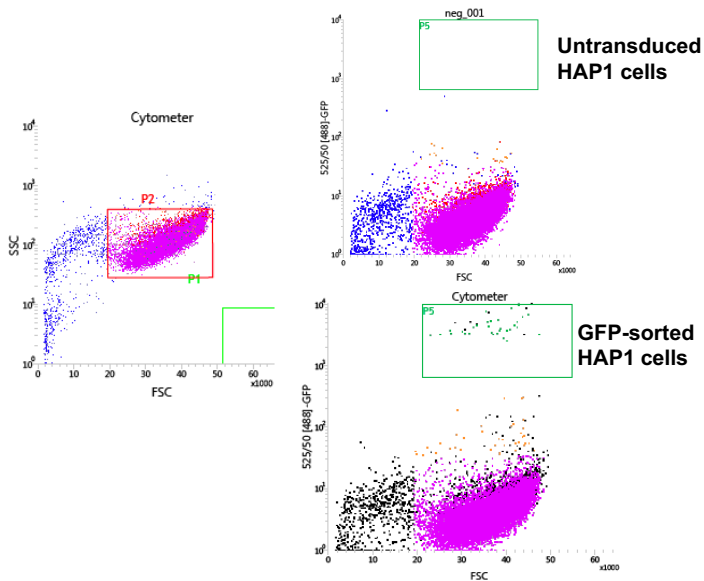

**D**

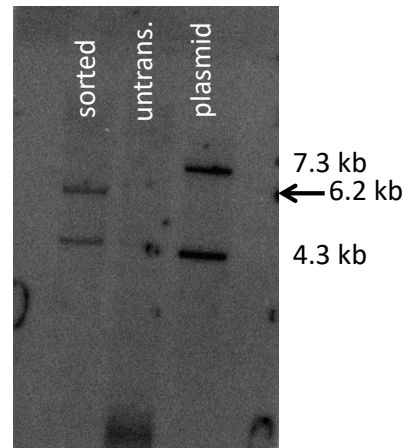

**Supplementary Figure 2. Characterization of FANCM knockout clones and the AAV-GAPDH(Hap1)-2A-GFP targeting vector. (A)** Nucleotide analysis by Sanger sequencing of the FANCM knockout #B12 and FANCM knockout #C1 HAP1 clones compared to the wild-type sequence. **(B)** Scheme of the PCR strategy used to detect TI events in the *GAPDH* locus after transduction with AAV-GAPDH(Hap1)-2A-GFP. The forward primer was designed to anneal outside the *GAPDH* homology arm sequence (i.e. outside of the part that is also included in the rAAV vector) and the reverse primer was designed to anneal within the GFP coding sequence. Upon TI, a 2.4 kb fragment is generated. **(C)** FACs plots depicting GFP expressing cells sorted for Southern blot analysis. **(D)** Southern blot analysis of DNA obtained from sorted HAP1 cells after transduction with AAV-GAPDH(Hap1)-2A-GFP. Untransduced HAP1 cells were used as control. Expected size for TI is approximately 6.2 kb. The lower band (~4.3 kb) corresponds to episomal AAV. Expected sizes for control plasmids are approximately 7.3 kb and 4.3 kb for GFP-containing plasmid.

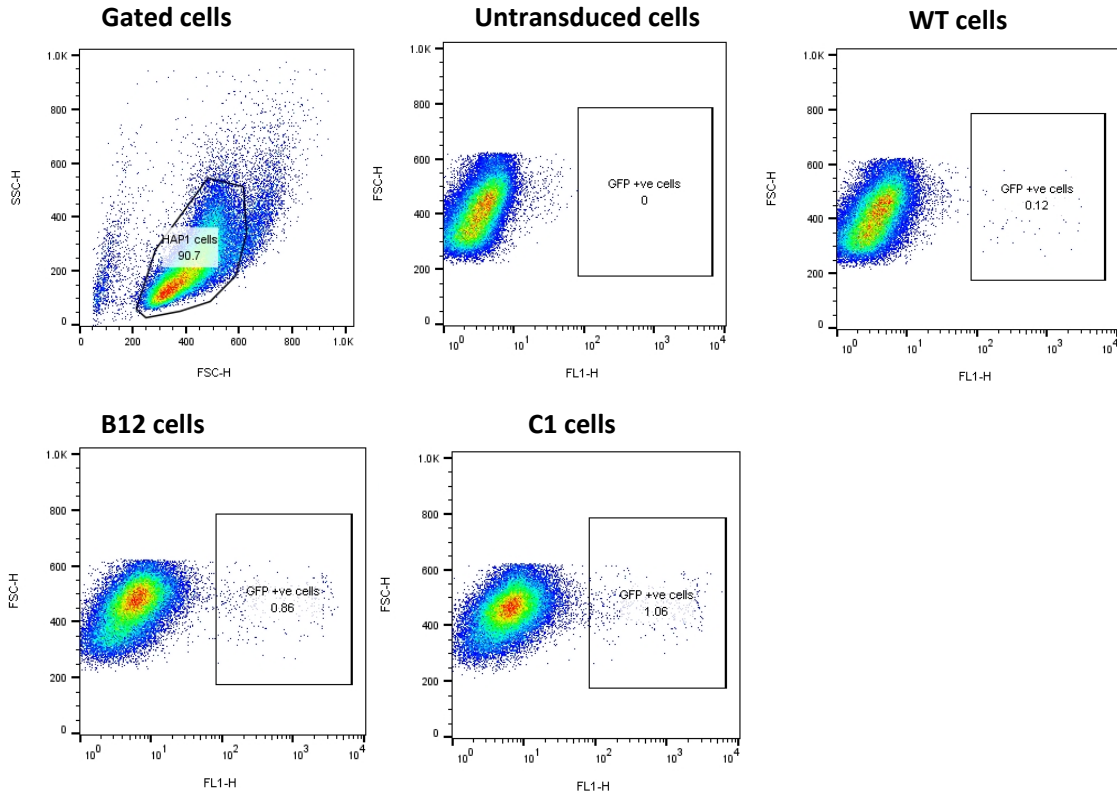

**Supplementary Figure 3. Flow cytometry analysis of FANCM knockout HAP1 cells after AAV-HR treatment.** Representative flow cytometry plots illustrating the typical gating strategy used for untransduced, wild-type, FANCM knockout #B12, and FANCM knockout #C1 HAP1 cells transduced with AAV-GAPDH(Hap1)-2A-GFP (MOI:16,000).

**A****HeLa FANCM K/O (Guide for exon 1)**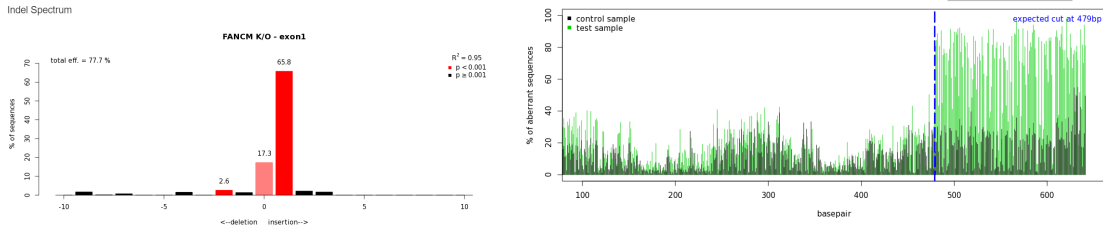**B****HeLa FANCM K/O (Guide for exon 4)**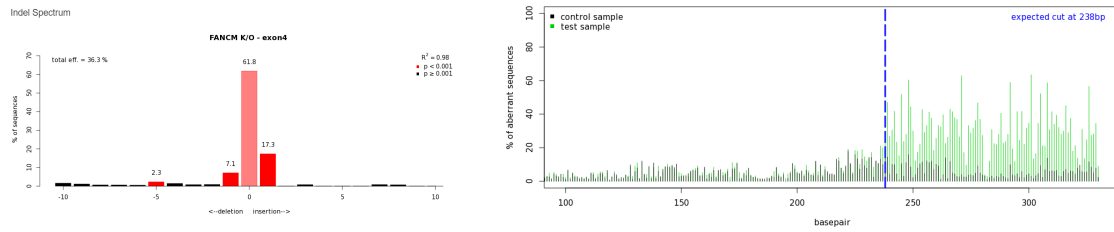**C**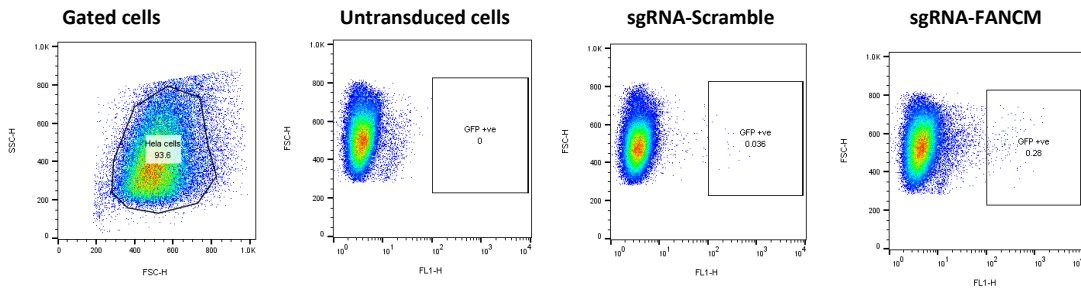**D**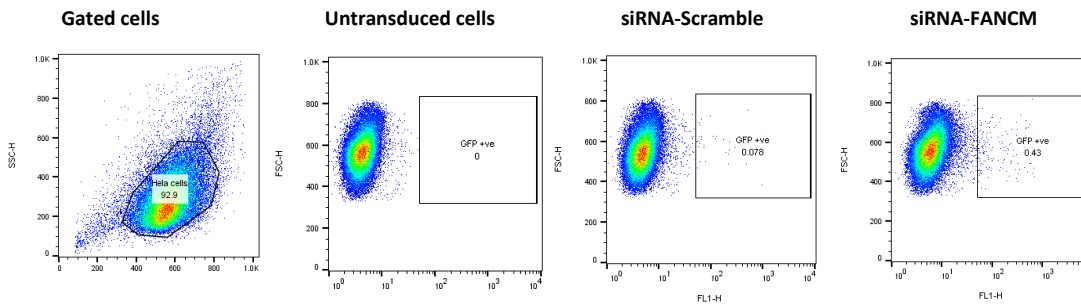

**Supplementary Figure 4. Analysis of FANCM knockout and knockdown experiments in HeLa cells. (A-B)** The graphs show the indel analysis of HeLa cells treated with CRISPR/Cas9 and two sgRNAs targeting, respectively, the exon 1 and exon 4 of the FANCM gene. Indels were analyzed using the TIDE software. **(C)** Representative flow cytometry plots illustrating the typical

gating strategy used for HeLa cells treated with CRISPR/Cas9 in combination with a scramble sgRNA or FANCM-targeted sgRNAs followed by transduction with AAV-GAPDH(HeLa)-2A-GFP (MOI:50,000). **(D)** Representative flow cytometry plots illustrating the typical gating strategy used for HeLa cells treated with a scramble siRNA and FANCM-targeted siRNA followed by transduction with AAV-GAPDH(HeLa)-2A-GFP (MOI:50,000).

**A**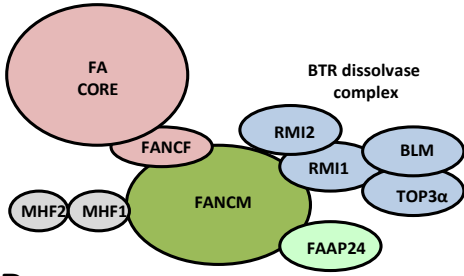**B****HAP1-RMI1 K/O clone D10 (2 bp deletion)**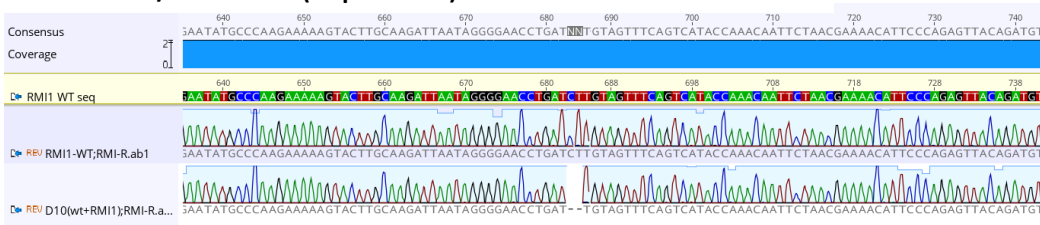**HAP1-RMI1 K/O clone E5 (61 bp insertion)**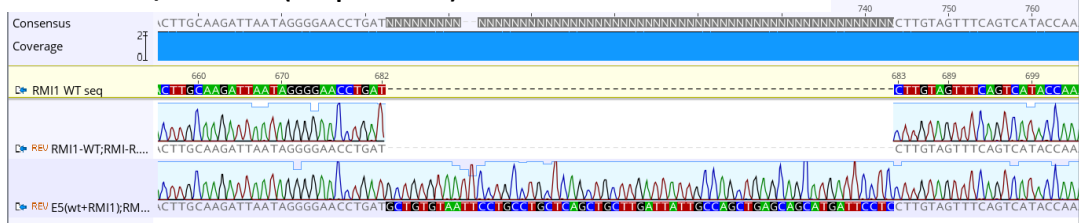**C**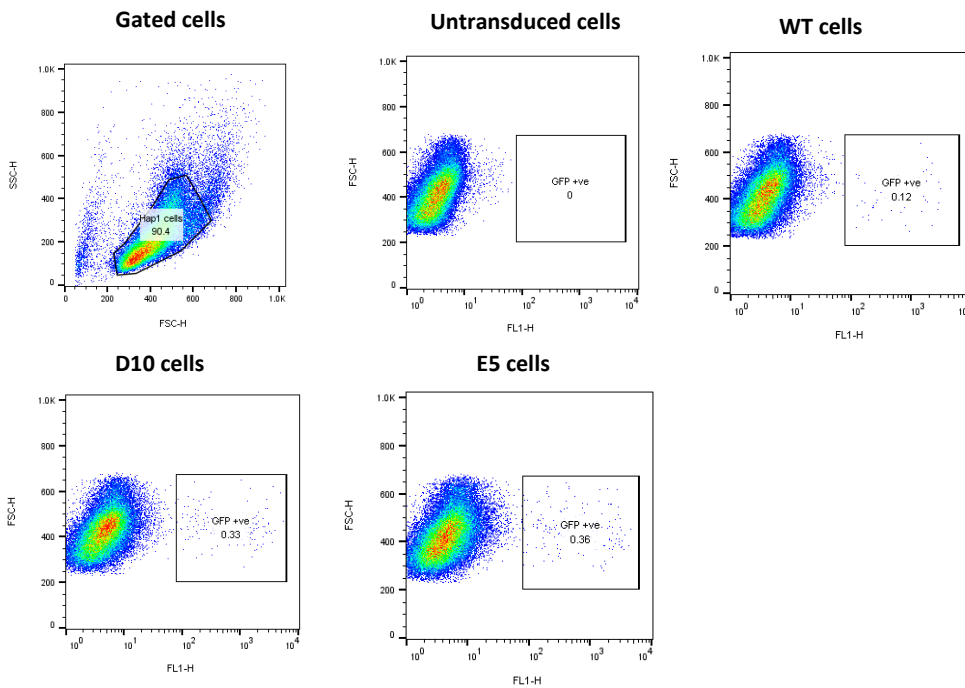



**Supplementary Figure 5. FANCM protein interactions and analysis of RMI1 knockout cells.**

**(A)** Scheme of FANCM protein interactions adapted from<sup>43</sup>. **(B)** Nucleotide analysis by Sanger sequencing of the RMI1 D10 and RMI1 E5 knockout HAP1 cells compared to the wild-type sequence. **(C)** Representative flow cytometry plots illustrating the typical gating strategy used for the untransduced, wild-type, RMI1 knockout #D10, and RMI1 knockout #E5 HAP1 cells, respectively, transduced with AAV-GAPDH(Hap1)-2A-GFP (MOI:16,000).

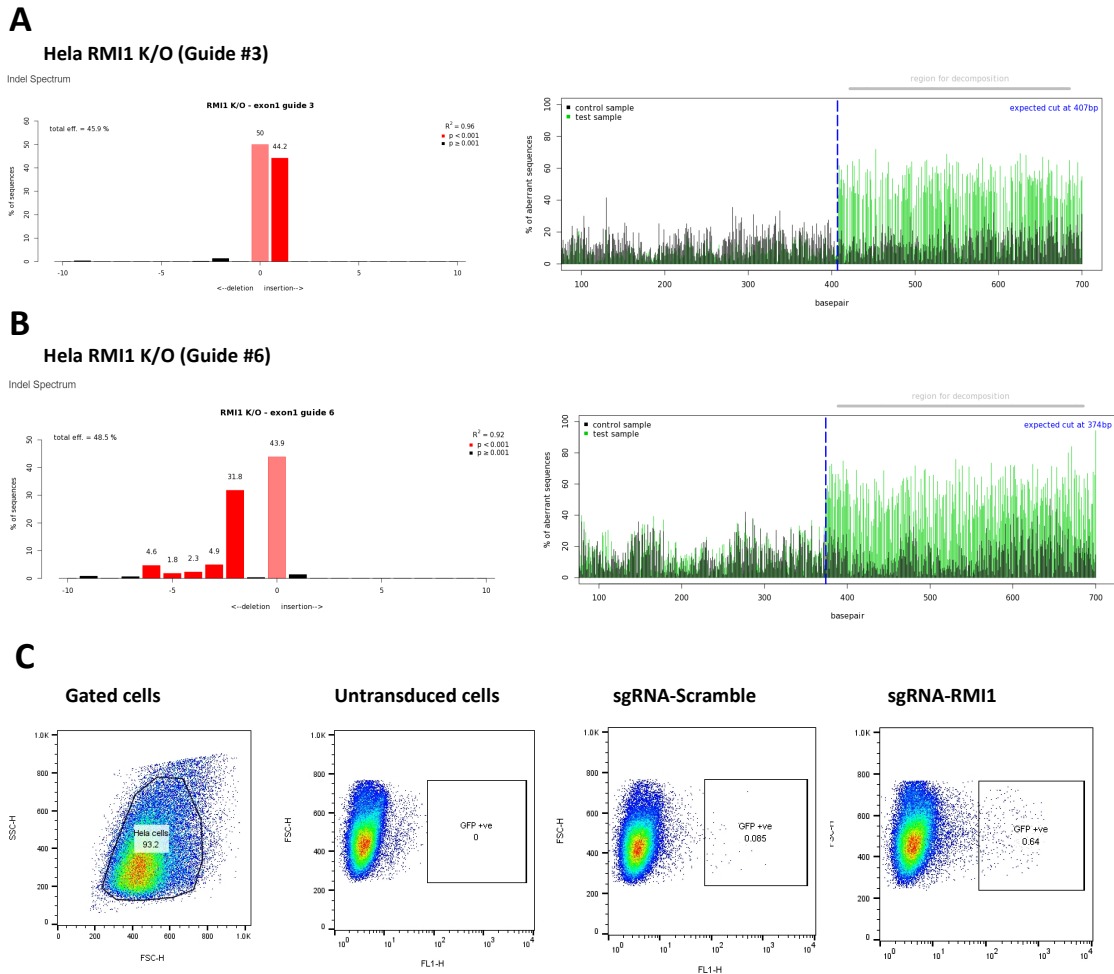

**Supplementary Figure 6. Analysis of RMI1 knockout experiments in HeLa cells. (A-B)** The graphs show indels analysis of HeLa cells treated with CRISPR/Cas9 and two different sgRNAs

targeting the exon 1 of RMI1 gene. Indels were analyzed using the TIDE software. (C) Representative flow cytometry plots illustrating the typical gating strategy used for HeLa cells treated with a scramble sgRNA and RMI1-targeted sgRNA followed by transduction with AAV-GAPDH(HeLa)-2A-GFP (MOI:50,000).

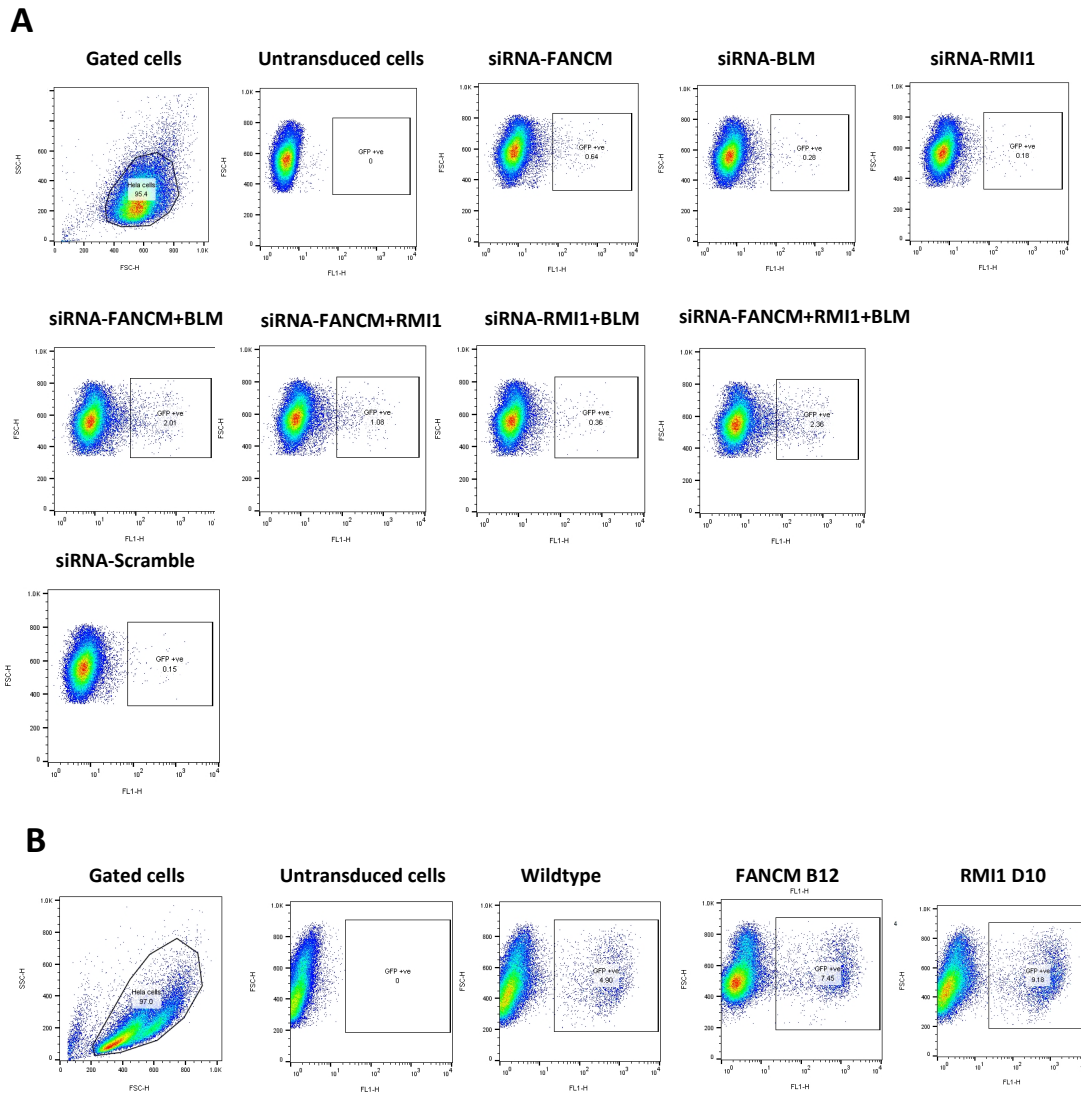

**Supplementary Figure 7. Flow cytometry analysis of knockdown and knockout experiments in HeLa and HAP1 cells after AAV-HR transduction. (A) Representative flow cytometry plots illustrating the typical gating strategy used for HeLa cells treated with a scramble siRNA,**

FANCM-targeted, RMI1-targeted, and BLM-targeted, FANCM+BLM-targeted, FANCM+RMI1-targeted, RMI1+BLM-targeted and FANCM+BLM+RMI1 targeted siRNAs, followed by transduction with AAV-GAPDH(HeLa)-2A-GFP (MOI:50,000). **(B)** Representative flow cytometry plots illustrating the typical gating strategy used for the untransduced, wild-type, FANCM knockout #B12, and RMI1 knockout #D10 HAP1 cells, respectively, treated with CRISPR/Cas9 targeting GAPDH locus followed by transduction with AAV-GAPDH(Hap1)-2A-GFP (MOI:800).

**A**

TP53BP1 K/O clone (40 bp deletion)

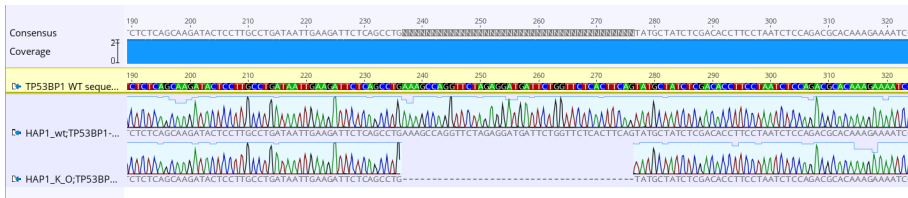

**B**

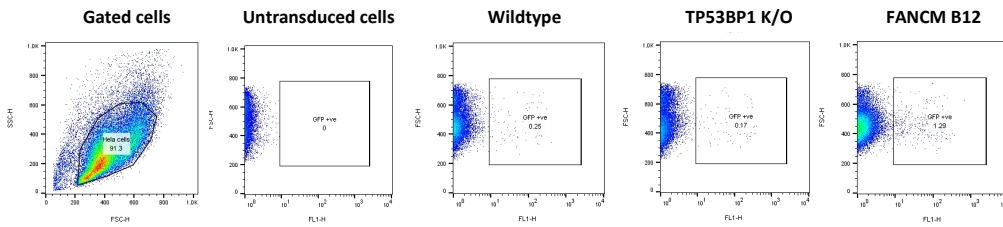

**C**

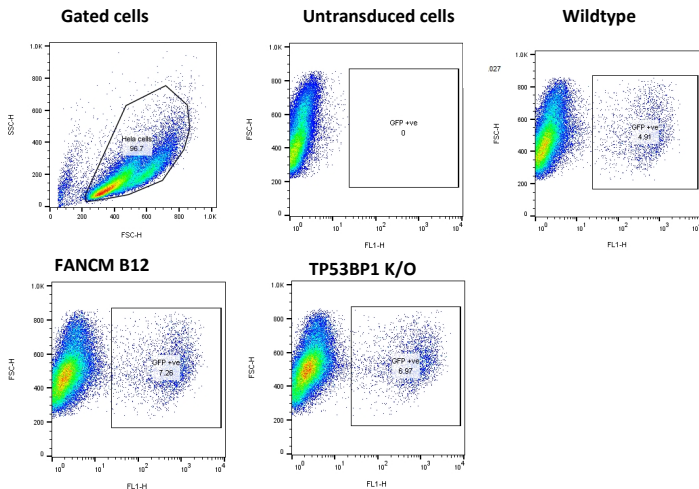

**Supplementary Figure 8. Analysis of TP53BP1 knockout cells.** (A) Nucleotide analysis by Sanger sequencing of the TP53BP1 knockout HAP1 cells compared to the wild-type sequence. (B) Representative flow cytometry plots illustrating the typical gating strategy used for the untransduced, wild-type, FANCM knockout #B12, and TP53BP1 knockout HAP1 cells, respectively, transduced with AAV-GAPDH(Hap1)-2A-GFP (MOI:16,000). (C) Representative flow cytometry plots illustrating the typical gating strategy used for the untransduced, wild-type, FANCM knockout #B12, and TP53BP1 knockout HAP1 cells, respectively treated with CRISPR/Cas9 targeting GAPDH locus followed by transduction with AAV-GAPDH(Hap1)-2A-GFP (MOI:800).
